# Supplementary material
Source: PubMed Central journal article supplement (PMC4169046)
Supplement: NIHMS591630-supplement-01.pdf [file NIHMS591630-supplement-01.pdf]

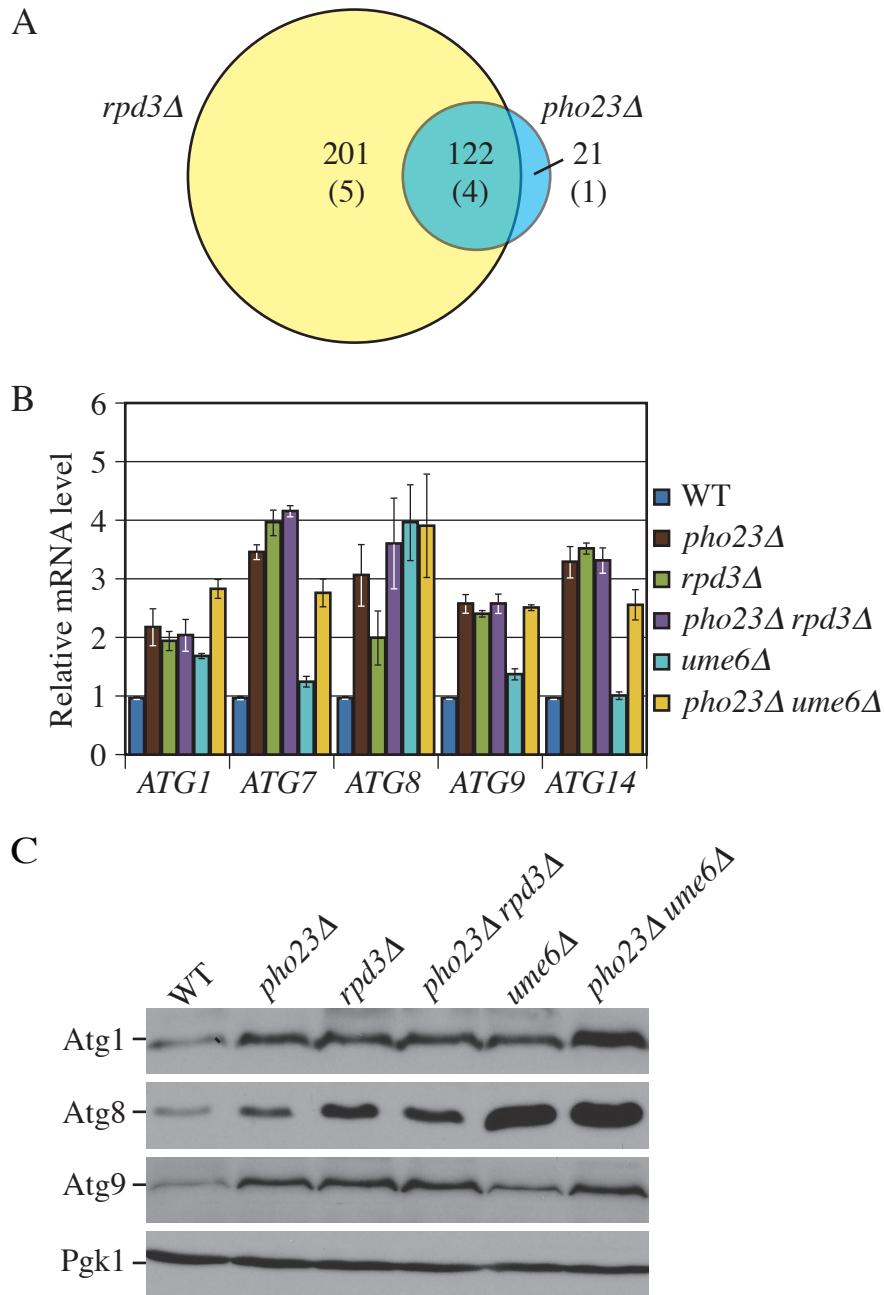

**Figure S1, Related to Figure 1.** Pho23 regulates ATG gene transcription in an Rpd3-dependent manner (A) Number of genes that have more than a 1.5-fold change in expression level in *pho23Δ* and *rpd3Δ* [4] strains relative to the wild-type strain are shown. Numbers in parentheses indicate the number of the ATG genes upregulated in the mutant strains. (B) Cells were grown in YPD to mid-log phase and RNA extracted as described in Materials and Methods. The relative mRNA levels of different ATG genes were measured in wild-type and mutant strains. The mRNA level of each gene in wild-type cells was set to 1, and other values were normalized. The error bars represent the SEM of three independent experiments. (C) Protein levels of Atg1, Atg8, and Atg9 were analyzed from protein extracts generated from mid-log phase wild-type (WLY176), *pho23Δ* (JMY048), *rpd3Δ* (JMY093), *pho23Δ rpd3Δ* (JMY094), *ume6Δ* (JMY097), and *pho23Δ ume6Δ* (JMY098) strains. Endogenous Atg proteins were detected by the indicated antisera, and Pgk1 was used as a loading control.

**Table S1, Related to Figure 1.** Strains used in this study

| <b>Name</b>           | <b>Genotype</b>                                                                                | <b>Ref</b>                   |
|-----------------------|------------------------------------------------------------------------------------------------|------------------------------|
| BY4742                | MAT $\alpha$ <i>his3<math>\Delta</math>1 leu2<math>\Delta</math>0 ura3<math>\Delta</math>0</i> | Research Genetics/Invitrogen |
| CWY230                | SEY6210 <i>vac8<math>\Delta</math>::KAN</i>                                                    | [S1]                         |
| FRY143                | SEY6210 <i>vps4<math>\Delta</math>::TRP1 pep4<math>\Delta</math>::LEU2</i>                     | [S2]                         |
| HDY001 (A9 $\Delta$ ) | WLY176 <i>ATG9<math>\Delta</math>::LEU2 pRS406::URA3</i>                                       | This study                   |
| HDY002 (A9WT)         | WLY176 <i>ATG9<math>\Delta</math>::LEU2 pRS406-P<sub>ATG9</sub>-ATG9-GFP::URA3</i>             | This study                   |
| HDY003 (A9Lo)         | WLY176 <i>ATG9<math>\Delta</math>::LEU2 pRS406-P<sub>ATG23</sub>-ATG9-GFP::URA3</i>            | This study                   |
| HDY007 (A9OE)         | WLY176 <i>pRS406-P<sub>ATG8</sub>-ATG9-GFP::URA3</i>                                           | This study                   |
| JMY015                | ZFY202 <i>pho23<math>\Delta</math>::KAN</i>                                                    | This study                   |
| JMY018                | BY4742 <i>pho23<math>\Delta</math>::HIS5</i>                                                   | This study                   |
| JMY020                | TVY1 <i>pho23<math>\Delta</math>::HIS5</i>                                                     | This study                   |
| JMY047                | SEY6210 <i>pho23<math>\Delta</math>::HIS5</i>                                                  | This study                   |
| JMY048                | WLY176 <i>pho23<math>\Delta</math>::HIS5</i>                                                   | This study                   |
| JMY050                | FRY143 <i>pho23<math>\Delta</math>::KAN</i>                                                    | This study                   |
| JMY093                | WLY176 <i>rpd3<math>\Delta</math>::HIS5</i>                                                    | This study                   |
| JMY094                | WLY176 <i>pho23<math>\Delta</math>::KAN rpd3<math>\Delta</math>::HIS5</i>                      | This study                   |
| JMY097                | WLY176 <i>ume6<math>\Delta</math>::HIS5</i>                                                    | This study                   |
| JMY098                | WLY176 <i>ume6<math>\Delta</math>::HIS5 pho23<math>\Delta</math>::KAN</i>                      | This study                   |

|         |                                                                                 |            |
|---------|---------------------------------------------------------------------------------|------------|
| JMY099  | WLY176 <i>ATG12-PA::HIS5</i>                                                    | This study |
| JMY100  | WLY176 <i>pho23Δ::KAN ATG12-PA::HIS5</i>                                        | This study |
| JMY102  | YZX94 <i>pho23Δ::KAN</i>                                                        | This study |
| JMY103  | HCY129 <i>pho23Δ::KAN</i>                                                       | This study |
| JMY104  | WLY176 <i>ATG7-PA::HIS5</i>                                                     | This study |
| JMY105  | WLY176 <i>ATG7-PA::HIS5 pho23Δ::KAN</i>                                         | This study |
| JMY146  | CWY230 <i>pho23Δ::HIS5</i>                                                      | This study |
| HCY129  | SEY6210 <i>ATG29-PA::TRP1</i>                                                   | [S3]       |
| MZY089  | SEY6210 <i>atg8Δ::HIS5 P<sub>ATG8</sub>-GFP-Atg8::LEU2</i>                      | [S4]       |
| SEY6210 | MAT $\alpha$ <i>leu2-3,112 ura3-52 his3-Δ200 trp1-Δ901 suc2-Δ9 lys2-801 GAL</i> | [S5]       |
| SKB233  | SEY6210 <i>atg8Δ::HIS5 P<sub>ATG8</sub>-GFP-Atg8::LEU2 pho23Δ::KAN</i>          | This study |
| TVY1    | SEY6210 <i>pep4Δ::LEU2</i>                                                      | [S6]       |
| W303-1B | MAT $\alpha$ <i>leu2-3,112 ura3-1 his3-11,15 trp1-1 ade2-1 can1-100</i>         | [S7]       |
| WLY176  | SEY6210 <i>pho13Δ pho8Δ60</i>                                                   | [S8]       |
| XLY054  | WLY176; <i>ATG9Δ::LEU2 pRS406::URA3 pep4Δ::KAN</i>                              | This study |
| XLY055  | WLY176; <i>ATG9Δ::LEU2 pRS406-P<sub>ATG23</sub>-ATG9-GFP::URA3 pep4Δ::KAN</i>   | This study |
| XLY056  | WLY176; <i>ATG9Δ::LEU2 pRS406-P<sub>ATG9</sub>-ATG9-GFP::URA3 pep4Δ::KAN</i>    | This study |
| XLY057  | WLY176; <i>pRS406-P<sub>ATG8</sub>-ATG9-GFP::URA3 pep4Δ::KAN</i>                | This study |
| YZX94   | BY4742; <i>ATG14-PA::HIS5</i>                                                   | This study |
| ZFY202  | W303-1B; <i>pho13Δ pho8Δ60</i>                                                  | [S9]       |

**Table S2, Related to Figure 3. WT vs. *pho23Δ* TEM data**

|                                   | Autophagic body size     |        |                    |        |          | Vacuole size             |         |                    |         | Autophagic body number       |                       | Total flux |
|-----------------------------------|--------------------------|--------|--------------------|--------|----------|--------------------------|---------|--------------------|---------|------------------------------|-----------------------|------------|
|                                   | Measured cross-sectional |        | Estimated original |        |          | Measured cross-sectional |         | Estimated original |         | Measured cross-sections/cell | Estimated bodies/cell |            |
|                                   | Mean rad                 | SD rad | Mean rad           | SD rad | Volume   | Mean rad                 | SD rad  | Mean rad           | SD rad  |                              |                       |            |
| <b>WT sample set 1</b>            | 154.134                  | 61.579 | 164.174            | 57.207 | 2.61E+07 | 996.298                  | 276.647 | 1132.894           | 237.068 | 5.982                        | 32.714                | 8.55E+08   |
| <b>WT sample set 2</b>            | 145.456                  | 61.472 | 150.492            | 57.964 | 2.16E+07 | 989.502                  | 265.114 | 1132.552           | 218.821 | 7.463                        | 43.532                | 9.41E+08   |
| <b>WT average</b>                 |                          |        | 157.333            | 57.586 | 2.39E+07 |                          |         |                    |         |                              | 38.123                | 8.98E+08   |
| <b><i>pho23Δ</i> sample set 1</b> | 140.472                  | 47.293 | 153.910            | 42.607 | 1.91E+07 | 1015.804                 | 293.056 | 1148.214           | 257.471 | 13.725                       | 80.583                | 1.54E+09   |
| <b><i>pho23Δ</i> sample set 2</b> | 133.372                  | 49.776 | 142.444            | 46.510 | 1.64E+07 | 978.013                  | 269.367 | 1107.574           | 232.527 | 15.000                       | 90.619                | 1.49E+09   |
| <b><i>pho23Δ</i> average</b>      |                          |        | 148.177            | 44.558 | 1.77E+07 |                          |         |                    |         |                              | 85.601                | 1.51E+09   |

**Table S3, Related to Figure 4. De-multiplexing results in 22M-31M reads of RNA-seq samples**

| Sample Description    | Barcode (5'→3') | Raw reads   | % of raw reads     |                    | % bases ≥ Q30 | Mean quality score | Mean error rate |
|-----------------------|-----------------|-------------|--------------------|--------------------|---------------|--------------------|-----------------|
|                       |                 |             | 0 mismatch barcode | 1 mismatch barcode |               |                    |                 |
| WT growing            | CGATGT          | 25,263,020  | 98.4%              | 1.6%               | 96.3%         | 37.88              | 1.6/10,000      |
| <i>pho23Δ</i> growing | TGACCA          | 30,612,154  | 97.8%              | 2.3%               | 96.2%         | 37.86              | 1.6/10,000      |
| WT starved            | GCCAAT          | 21,992,351  | 97.8%              | 2.2%               | 96.2%         | 37.85              | 1.6/10,000      |
| <i>pho23Δ</i> starved | CAGATC          | 24,344,369  | 97.9%              | 2.1%               | 96.2%         | 37.87              | 1.6/10,000      |
| No barcode            | NA              | 3,124,074   | NA                 | NA                 | 93.8%         | 37.03              | 2.0/10,000      |
|                       | <i>Total:</i>   | 105,335,968 |                    |                    |               |                    |                 |

**Table S4, Related to Figure 4.** Mapping the reads of RNA-seq samples to the yeast transcriptome using Bowtie2

| Sample Description    | Raw reads  | Mapped reads | % of raw | Mapped, score $\geq 88$ | % of raw | Uniquely mapped, score $\geq 88$ | % of raw | Multi mapped, score $\geq 88$ | % of raw |
|-----------------------|------------|--------------|----------|-------------------------|----------|----------------------------------|----------|-------------------------------|----------|
| WT growing            | 25,263,020 | 23,690,179   | 93.8%    | 22,965,459              | 90.9%    | 17,685,706                       | 70.0%    | 5,279,753                     | 20.9%    |
| <i>pho23Δ</i> growing | 30,612,154 | 28,348,799   | 92.6%    | 27,483,468              | 89.8%    | 21,475,572                       | 70.2%    | 6,007,896                     | 19.6%    |
| WT starved            | 21,992,351 | 20,296,160   | 92.3%    | 19,636,451              | 89.3%    | 17,049,729                       | 77.5%    | 2,586,722                     | 11.8%    |
| <i>pho23Δ</i> starved | 24,344,369 | 22,545,466   | 92.6%    | 21,846,077              | 89.7%    | 18,481,608                       | 75.9%    | 3,364,469                     | 13.8%    |

**Table S5, Related to Figure 5.** A9 strains TEM data

|          |      | Autophagic body size     |        |                    |        |          | Vacuole size             |         |                    |         | Autophagic body number       |                       | Total flux | % flux |
|----------|------|--------------------------|--------|--------------------|--------|----------|--------------------------|---------|--------------------|---------|------------------------------|-----------------------|------------|--------|
|          |      | Measured cross-sectional |        | Estimated original |        |          | Measured cross-sectional |         | Estimated original |         | Measured cross-sections/cell | Estimated bodies/cell |            |        |
|          |      | Mean rad                 | SD rad | Mean rad           | SD rad | Volume   | Mean rad                 | SD rad  | Mean rad           | SD rad  |                              |                       |            |        |
| Sample 1 | A9Lo | 151.214                  | 44.113 | 169.029            | 36.365 | 2.32E+07 | 839.859                  | 216.434 | 939.549            | 194.337 | 2.856                        | 12.686                | 2.94E+08   | 50.7%  |
|          | A9WT | 133.150                  | 35.521 | 146.124            | 31.534 | 1.50E+07 | 835.052                  | 219.762 | 929.285            | 201.215 | 8.232                        | 41.660                | 6.24E+08   | 107.6% |
|          | A9OE | 130.633                  | 33.522 | 143.491            | 29.268 | 1.40E+07 | 893.063                  | 257.700 | 989.008            | 241.469 | 10.000                       | 55.496                | 7.76E+08   | 133.8% |
| Sample 2 | A9Lo | 150.904                  | 49.666 | 163.046            | 46.375 | 2.29E+07 | 885.798                  | 251.927 | 982.226            | 234.885 | 3.088                        | 14.314                | 3.28E+08   | 56.6%  |
|          | A9WT | 126.450                  | 33.223 | 137.063            | 30.134 | 1.24E+07 | 914.461                  | 255.760 | 1026.609           | 233.004 | 7.309                        | 43.105                | 5.36E+08   | 92.4%  |
|          | A9OE | 128.857                  | 35.898 | 138.916            | 33.148 | 1.33E+07 | 906.265                  | 255.857 | 1012.629           | 235.507 | 9.155                        | 54.567                | 7.23E+08   | 124.8% |

## Supplemental References

- S1. Umekawa, M., and Klionsky, D.J. (2012). Ksp1 kinase regulates autophagy via the target of rapamycin complex 1 (TORC1) pathway. *J Biol Chem* 287, 16300-16310.
- S2. Cheong, H., Yorimitsu, T., Reggiori, F., Legakis, J.E., Wang, C.-W., and Klionsky, D.J. (2005). Atg17 regulates the magnitude of the autophagic response. *Mol Biol Cell* 16, 3438-3453.
- S3. Mao, K., Chew, L.H., Inoue-Aono, Y., Cheong, H., Nair, U., Popelka, H., Yip, C.K., and Klionsky, D.J. (2013). Atg29 phosphorylation regulates coordination of the Atg17-Atg31-Atg29 complex with the Atg11 scaffold during autophagy initiation. *Proc Natl Acad Sci U S A* 110, E2875-2884.
- S4. Cebollero, E., van der Vaart, A., Zhao, M., Rieter, E., Klionsky, D.J., Helms, J.B., and Reggiori, F. (2012). Phosphatidylinositol-3-phosphate clearance plays a key role in autophagosome completion. *Curr Biol* 22, 1545-1553.
- S5. Robinson, J.S., Klionsky, D.J., Banta, L.M., and Emr, S.D. (1988). Protein sorting in *Saccharomyces cerevisiae*: isolation of mutants defective in the delivery and processing of multiple vacuolar hydrolases. *Mol Cell Biol* 8, 4936-4948.
- S6. Gerhardt, B., Kordas, T.J., Thompson, C.M., Patel, P., and Vida, T. (1998). The vesicle transport protein Vps33p is an ATP-binding protein that localizes to the cytosol in an energy-dependent manner. *J Biol Chem* 273, 15818-15829.
- S7. Thomas, B.J., and Rothstein, R. (1989). Elevated recombination rates in transcriptionally active DNA. *Cell* 56, 619-630.
- S8. Kanki, T., Wang, K., Baba, M., Bartholomew, C.R., Lynch-Day, M.A., Du, Z., Geng, J., Mao, K., Yang, Z., Yen, W.-L., et al. (2009). A genomic screen for yeast mutants defective in selective mitochondria autophagy. *Mol Biol Cell* 20, 4730-4738.
- S9. Yang, Z., Geng, J., Yen, W.-L., Wang, K., and Klionsky, D.J. (2010). Positive or negative roles of different cyclin-dependent kinase Pho85-cyclin complexes orchestrate induction of autophagy in *Saccharomyces cerevisiae*. *Mol Cell* 38, 250-264.
